# Supplementary material for: Development and Experimental Assessment of a Model for the Material Deposition by Laser-Induced Forward Transfer
Source: MDPI journal article supplement (doi:10.3390/app12031361), 2022-01-27
Supplement: s1 [file s1]

Archive with 1 entries (1 files):
- applsci-1532006-SI.pdf
